# Supplementary material
Source: publisher figshare collection journal article supplement (https://tandf.figshare.com/articles/dataset/_/12248033)
Supplement: Supplementary file 1 [file 2]

Archive with 5 entries (5 files):
- Supplementary Table 1.pdf
- Supplementary Table 2.pdf
- Supplementary Table 3.pdf
- Supplementary Table 4.pdf
- Supplementary Table 5.pdf
