# Supplementary material
Source: publisher figshare collection journal article supplement (https://tandf.figshare.com/articles/dataset/_/12248033)
Supplement: Supplementary file 1 [file 2 › Supplementary Table 1.pdf]

Supplementary Table 1. The mean and median values of conjunctival congestion score at desired time points.

|        |                  |           |        |        |
|--------|------------------|-----------|--------|--------|
| Day 7  | Normal Control   | 0.00±0.00 | 0(0-0) | <0.001 |
|        | Negative Control | 1.56±0.53 | 2(1-2) |        |
|        | Xenogenic HAM    | 1.44±0.73 | 1(1-3) |        |
|        | Allogenic Sclera | 1.50±0.93 | 1(1-3) |        |
|        | Autogenic PRF    | 0.78±0.67 | 1(0-2) |        |
| Day 28 | Normal Control   | 0.00±0.00 | 0(0-0) | 0.001  |
|        | Negative Control | 0.83±0.75 | 1(0-2) |        |
|        | Xenogenic HAM    | 1.33±0.52 | 1(1-2) |        |
|        | Allogenic Sclera | 1.40±0.89 | 2(0-2) |        |
|        | Autogenic PRF    | 0.00±0.00 | 0(0-0) |        |
| Day 56 | Normal Control   | 0.00±0.00 | 0(0-0) | 0.034  |
|        | Negative Control | 0.67±0.58 | 1(0-1) |        |
|        | Xenogenic HAM    | 1.33±0.58 | 1(1-2) |        |
|        | Allogenic Sclera | 1.00±0.00 | 1(1-1) |        |
|        | Autogenic PRF    | 0.00±0.00 | 0(0-0) |        |

HAM: human-derived amniotic membrane, PRF: platelet-rich fibrin membrane, SD: standard deviation.
