# Supplementary material
Source: publisher figshare collection journal article supplement (https://tandf.figshare.com/articles/dataset/_/12248033)
Supplement: Supplementary file 1 [file 2 › Supplementary Table 2.pdf]

Supplementary Table 2. The clinical evaluations and scores on day 7.

| 7 DAYS           |   |                  |     |                                 |            |                   |              |
|------------------|---|------------------|-----|---------------------------------|------------|-------------------|--------------|
|                  | N | Eyelid Discharge | CC  | Location/Viability of the Graft | Wound Area | Cornea            | Complication |
| Negative Control | 1 | Mucoid           | ++  | -                               | MCR        | Clear             | -            |
|                  | 2 | -                | ++  | -                               | MCR        | Clear             | -            |
|                  | 3 | Mucoid           | ++  | -                               | MCR        | Epithelial Defect | -            |
|                  | 4 | Mucoid           | +   | -                               | MCR        | Epithelial Defect | -            |
|                  | 5 | Mucoid           | ++  | -                               | CNV        | Clear             | -            |
|                  | 6 | Mucoid           | ++  | -                               | MCR        | Epithelial Defect | -            |
|                  | 7 | -                | +   | -                               | MCR        | Clear             | -            |
|                  | 8 | Mucoid           | +   | -                               | MCR        | Clear             | -            |
|                  | 9 | Mucoid           | +   | -                               | MCR        | Clear             | -            |
| Xenogenic HAM    | 1 | Mucoid           | +   | Within the wound/viable         | CNV        | Epithelial Defect | -            |
|                  | 2 | Mucoid           | +++ | Out of the wound/ viable        | CNV        | Clear             | -            |
|                  | 3 | Mucoid           | ++  | Out of the wound / viable       | CNV        | Epithelial Defect | -            |
|                  | 4 | Mucoid           | ++  | Within the wound/ viable        | CNV        | Clear             | -            |
|                  | 5 | Mucoid           | +   | Within the wound/ viable        | CNV        | Clear             | -            |
|                  | 6 | Mucoid           | +   | Within the wound/ viable        | MCR        | Epithelial Defect | -            |
|                  | 7 | Mucoid           | +   | Within the wound/ viable        | MCR        | Clear             | -            |
|                  | 8 | -                | +   | Within the wound/ viable        | CNV        | Clear             | -            |
|                  | 9 | Mucoid           | +   | Out of the wound/ viable        | CNV        | Clear             | -            |
| Allogenic Sclera | 1 | Mucoid           | +++ | Within the wound / avascular    | CNV        | Clear             | -            |
|                  | 2 | -                | +   | Within the wound/ viable        | CNV        | Clear             | -            |
|                  | 3 | -                | +   | Within the wound/ viable        | CNV        | Clear             | -            |
|                  | 4 | Mucoid           | +++ | Within the wound/ avascular     | CNV        | Clear             | -            |
|                  | 5 | -                | +   | Within the wound/ viable        | CNV        | Clear             | -            |
|                  | 6 | -                | +   | Within the wound/ viable        | CNV        | Clear             | -            |
|                  | 7 | Mucoid           | +   | Within the wound/ viable        | MCR        | Clear             | -            |
|                  | 8 | -                | +   | Within the wound/ viable        | CNV        | Clear             | -            |
|                  | 9 | Excluded         |     |                                 |            |                   |              |
| Autogenic PRF    | 1 | -                | +   | Within the wound/ viable        | CNV        | Clear             | -            |
|                  | 2 | -                | -   | Within the wound/ viable        | CNV        | Clear             | -            |
|                  | 3 | -                | -   | Within the wound/ viable        | MCR        | Clear             | -            |
|                  | 4 | Mucoid           | ++  | Within the wound/ viable        | CNV        | Clear             | -            |
|                  | 5 | -                | +   | Within the wound/ viable        | CNV        | Clear             | -            |
|                  | 6 | Mucoid           | +   | Within the wound/ viable        | MCR        | Clear             | -            |
|                  | 7 | -                | +   | Within the wound/ viable        | CNV        | Clear             | -            |
|                  | 8 | -                | -   | Within the wound/ viable        | CNV        | Clear             | -            |
|                  | 9 | -                | -   | Within the wound/ viable        | CNV        | Clear             | -            |

CC: conjunctival congestion, CNV: choroid not visible, HAM: human-derived amniotic membrane, N: number of rabbit, MCR: marked choroidal reflection, PRF: platelet-rich fibrin.
