# Supplementary material
Source: publisher figshare collection journal article supplement (https://tandf.figshare.com/articles/dataset/_/12248033)
Supplement: Supplementary file 1 [file 2 › Supplementary Table 3.pdf]

Supplementary Table 3. The clinical evaluations and scores on day 28.

| 28 DAYS          |   |                  |    |                                 |            |        |              |
|------------------|---|------------------|----|---------------------------------|------------|--------|--------------|
|                  | N | Eyelid Discharge | CC | Location/Viability of the Graft | Wound Area | Cornea | Complication |
| Negative Control | 4 | -                | -  | -                               | MCR        | Clear  | -            |
|                  | 5 | -                | -  | -                               | MCR        | Clear  | -            |
|                  | 6 | Mucoid           | +  | -                               | MCR        | Clear  | -            |
|                  | 7 | Mucoid           | ++ | -                               | MCR        | Clear  | Symblepharon |
|                  | 8 | -                | +  | -                               | MCR        | Clear  | -            |
|                  | 9 | Mucoid           | +  | -                               | MCR        | Clear  | -            |
| Xenogenic HAM    | 4 | Mucoid           | ++ | Graft not visible               | CNV        | Clear  | -            |
|                  | 5 | -                | +  | Within the wound/ viable        | CNV        | Clear  | -            |
|                  | 6 | -                | +  | Graft not visible               | MCR        | Clear  | -            |
|                  | 7 | Mucoid           | ++ | Graft not visible               | MCR        | Clear  | -            |
|                  | 8 | -                | +  | Within the wound/ viable        | CNV        | Clear  | -            |
|                  | 9 | Mucoid           | +  | Graft not visible               | CNV        | Clear  | Symblepharon |
| Allogenic Sclera | 4 | Mucoid           | ++ | Within the wound/ avascular     | CNV        | Clear  | -            |
|                  | 5 | Mucoid           | ++ | Within the wound/ viable        | CNV        | Clear  | -            |
|                  | 6 | -                | -  | Within the wound/ viable        | CNV        | Clear  | -            |
|                  | 7 | Mucoid           | ++ | Within the wound/ viable        | MCR        | Clear  | Symblepharon |
|                  | 8 | -                | +  | Within the wound/ viable        | CNV        | Clear  | -            |
|                  | 9 | Excluded         |    |                                 |            |        |              |
| Autogenic PRF    | 4 | -                | -  | Graft not visible               | CNV        | Clear  | -            |
|                  | 5 | -                | -  | Graft not visible               | CNV        | Clear  | -            |
|                  | 6 | -                | -  | Graft not visible               | MCR        | Clear  | -            |
|                  | 7 | -                | -  | Graft not visible               | CNV        | Clear  | -            |
|                  | 8 | -                | -  | Graft not visible               | CNV        | Clear  | -            |
|                  | 9 | -                | -  | Graft not visible               | CNV        | Clear  | -            |

CC: conjunctival congestion, CNV: choroid not visible, HAM: human-derived amniotic membrane, N: number of rabbit, MCR: marked choroidal reflection, PRF: platelet-rich fibrin.
