# Supplementary material
Source: publisher figshare collection journal article supplement (https://tandf.figshare.com/articles/dataset/_/12248033)
Supplement: Supplementary file 1 [file 2 › Supplementary Table 4.pdf]

Supplementary Table 4. The clinical evaluations and scores on day 56.

| 56 DAYS          |   |                  |    |                                 |            |        |              |
|------------------|---|------------------|----|---------------------------------|------------|--------|--------------|
|                  | N | Eyelid Discharge | CC | Location/Viability of the Graft | Wound Area | Cornea | Complication |
| Negative Control | 7 | -                | -  | -                               | MCR        | Clear  | Symblepharon |
|                  | 8 | -                | +  | -                               | MCR        | Clear  | -            |
|                  | 9 | -                | +  | -                               | MCR        | Clear  | -            |
| Xenogenic HAM    | 7 | -                | +  | Graft not visible               | MCV        | Clear  | -            |
|                  | 8 | -                | ++ | Graft not visible               | CNV        | Clear  | -            |
|                  | 9 | -                | +  | Graft not visible               | CNV        | Clear  | Symblepharon |
| Allogenic Sclera | 7 | -                | +  | Graft not visible               | MCV        | Clear  | Symblepharon |
|                  | 8 | -                | +  | Graft not visible               | CNV        | Clear  | -            |
|                  | 9 | Excluded         |    |                                 |            |        |              |
| Autogenic PRF    | 7 | -                | -  | Graft not visible               | CNV        | Clear  | -            |
|                  | 8 | -                | -  | Graft not visible               | CNV        | Clear  | -            |
|                  | 9 | -                | -  | Graft not visible               | CNV        | Clear  | -            |

CC: conjunctival congestion, CNV: choroid not visible, HAM: human-derived amniotic membrane, N: number of rabbit, MCR: marked choroidal reflection, PRF: platelet-rich fibrin.
