# Supplementary material
Source: publisher figshare collection journal article supplement (https://tandf.figshare.com/articles/dataset/_/12248033)
Supplement: Supplementary file 1 [file 2 › Supplementary Table 5.pdf]

Supplementary Table 5. Reagents and biological products used during the study.

| <b>Product</b>                                 | <b>Code</b>   | <b>Company</b>           | <b>Country</b> |
|------------------------------------------------|---------------|--------------------------|----------------|
| Hematoxylin                                    | HX84908574    | Merck                    | Germany        |
| Eosin Y-solution 0.5% alcoholic                | HX61092539    | Merck                    | Germany        |
| Entellan                                       | HX378130      | Merck                    | Germany        |
| 96% Ethyl Alcohol                              | 150318185001  | Teksoll                  | Turkey         |
| Xylol - 2.5                                    | 16446         | Sigma                    | USA            |
| NaCl                                           | K49469804 806 | Merck                    | Germany        |
| KH <sub>2</sub> PO <sub>4</sub>                | AM1089973 732 | Merck                    | Germany        |
| K <sub>2</sub> HPO <sub>4</sub>                | AM1089973 732 | Merck                    | Germany        |
| Citric acid                                    | K93661307 633 | Merck                    | Germany        |
| Blocking serum (Ultra V Block)                 | TP-060-HL     | NeoMarker, Fremont, CA   | USA            |
| Peroxidase-labeled streptavidin                | TP-125HL      | Thermo Scientific        | USA            |
| Hydrogen Peroxide-30%                          | K44176709 304 | Merck                    | Germany        |
| SensiTek HRP Anti-Polyvalent 125ml Lab Pack    | 14896         | ScyTek Laboratories      | USA            |
| Anti mouse IgG (H + L) secondary antibody      | SG253594      | Invitrogen               | USA            |
| Anti rabbit IgG (H+L) secondary antibody       | SH253595      | Invitrogen               | USA            |
| Mayer's Hematoxylin                            | S3309         | Dako                     | USA            |
| Vision-mount                                   | TA-125G       | Thermo Scientific        | USA            |
| SigmaFast 3,3'-Diamino-benzidine tablets (DAB) | D4168-50SET   | Sigma                    | USA            |
| Mallory Trichrom                               | 04-020802     | Bio-optica               | Italy          |
| Verhoef                                        | 04-056802     | Bio-optica               | Italy          |
| Acid Fuxin                                     | F8129         | Sigma                    | USA            |
| Anti-AggreCAN ARGxx antibody                   | ab3773        | Abcam                    | England        |
| Anti-Collagen, Type I antibody                 | C2456         | Sigma                    | USA            |
| Anti-BMP2 antibody                             | ab6285        | Abcam                    | England        |
| Anti-FGF21 Polyclonal Antibody                 | PA5-44325     | Invitrogen               | USA            |
| Anti-MMP2 antibody                             | ab2462        | Abcam                    | England        |
| TGFBR1                                         | ab31013       | Abcam                    | England        |
| Pap pen (liquid blocker)                       |               |                          | Japan          |
| Ketamin 10%                                    |               | Bremer Pharma            | Germany        |
| Xylazine (Alfazyne 2%)                         |               | Alfasan International BV | Netherlands    |
| D-PBS                                          |               | Lonza                    | Swiss          |
| Penicillin                                     |               | Sigma                    | USA            |
| Streptomycin                                   |               | Sigma                    | USA            |
| Amphotericin B                                 |               | Hyoclon                  | England        |
| DMEM/F12 medium                                |               | Sigma                    | USA            |
| Moxifloxacin (Vigamox 0.5%)                    |               | Alcon                    | USA            |
| Prednisolone acetate (Pred Forte 1%)           |               | Allergan                 | Ireland        |
| 4% Formaldehyde                                |               | Merck                    | Germany        |
